# Supplementary material for: Prefrontal Cortex Hemodynamics and Functional Connectivity Changes during Performance Working Memory Tasks in Older Adults with Sleep Disorders
Source: MDPI journal article supplement (doi:10.3390/brainsci13030497), 2023-03-15
Supplement: s1 [file s1]

Supplementary

# Prefrontal Cortex Hemodynamics and Functional Connectivity Changes During Performance Working Memory Tasks in Older Adults with Sleep Disorders

Jiahui Gao<sup>1†</sup>, Lin Zhang<sup>1†</sup>, Jingfang Zhu<sup>1</sup>, Zhenxing Guo<sup>1</sup>, Miaoran Lin<sup>1</sup>, Linxin Bai<sup>1</sup>, Peiyun Zheng<sup>1</sup>, Weilin Liu<sup>1</sup>, Jia Huang<sup>1</sup> and Zhizhen Liu<sup>1,2\*</sup>

<sup>1</sup>College of Rehabilitation Medicine, Fujian University of Traditional Chinese Medicine, Fuzhou, Fujian 350122, China;

<sup>2</sup>National-Local Joint Engineering Research Center of Rehabilitation Medicine Technology, Fujian University of Traditional Chinese Medicine, Fuzhou, Fujian 350122, China

HbR were significantly different in channel 3 (located in DLPFC) and channel 40(located in FPC) during the 2-back task, and both showed higher levels in the SD group. HbT was significantly different in channel 8(located in DLPFC) during 0-back 、 1-back and 2-back tasks, and both showed smaller values in the SD group. While HbO is more sensitive and dependable than HbR, so only the results of HbR were discussed in this study.

**Scheme 1.** Oxygenated hemoglobin concentration changes in the HC and SD performing 0-back.

| Brain re-<br>gions | Channel | SD group          | HC group          | t/Z   | P-value | FDR  | Effect Size |
|--------------------|---------|-------------------|-------------------|-------|---------|------|-------------|
| DLPFC              | CH1     | -0.13±0.27        | -0.05±0.26        | -1.00 | 0.32    | 0.66 | −0.24       |
| DLPFC              | CH2     | -0.06±0.26        | 0.04±0.32         | -1.96 | 0.05    | 0.66 | −0.46       |
| DLPFC              | CH3     | -0.18(-0.32±0.04) | -0.12(-0.31±0.03) | 0.27  | 0.80    | 0.93 | -0.04       |
| DLPFC              | CH4     | -0.13±0.33        | -0.03±0.28        | -1.78 | 0.08    | 0.66 | −0.41       |
| DLPFC              | CH5     | 0.08(-0.26±0.36)  | -0.09(-0.29±0.21) | 1.41  | 0.16    | 0.66 | 0.20        |
| DLPFC              | CH7     | 0.05±0.77         | 0.01±0.54         | 0.14  | 0.89    | 0.93 | 0.03        |
| DLPFC              | CH8     | -0.15±0.36        | 0.00±0.35         | -1.15 | 0.26    | 0.66 | −0.27       |
| DLPFC              | CH9     | -0.15±0.23        | -0.01±0.34        | -2.3  | 0.02    | 0.66 | −0.54       |
| DLPFC              | CH10    | -0.13(-0.42±0.15) | -0.06(-0.32±0.28) | 1.40  | 0.16    | 0.66 | -0.19       |
| DLPFC              | CH11    | -0.04±0.28        | 0.01±0.26         | -0.99 | 0.32    | 0.66 | −0.23       |

|       |      |                   |                   |       |      |      |       |
|-------|------|-------------------|-------------------|-------|------|------|-------|
| DLPFC | CH12 | -0.03(-0.22±0.11) | 0.02(-0.27±0.12)  | 0.97  | 0.33 | 0.66 | -0.13 |
| DLPFC | CH13 | -0.14(-0.32±0.16) | -0.08(-0.26±0.11) | 0.42  | 0.68 | 0.93 | -0.06 |
| DLPFC | CH14 | -0.16±0.33        | -0.09±0.27        | -0.99 | 0.33 | 0.66 | -0.23 |
| DLPFC | CH19 | -0.01(-0.34-0.23) | -0.05(-0.15-0.06) | -1.09 | 0.28 | 0.66 | 0.15  |
| DLPFC | CH23 | 0.22±0.84         | 0.04±0.55         | 1.21  | 0.23 | 0.66 | 0.28  |
| DLPFC | CH29 | -0.03(-0.31±0.24) | 0.04(-0.31±0.29)  | 0.98  | 0.33 | 0.66 | -0.13 |
| DLPFC | CH34 | -0.07±0.45        | -0.13±0.35        | 0.62  | 0.54 | 0.91 | 0.15  |
| DLPFC | CH50 | -0.26(-0.56±0.20) | -0.31(-0.69±0.04) | -0.50 | 0.62 | 0.93 | 0.07  |
| DLPFC | CH55 | 0.29±0.87         | 0.10±0.67         | 0.98  | 0.33 | 0.66 | 0.23  |
| VLPFC | CH17 | -0.14(-0.38±0.19) | -0.10(-0.32±0.13) | 0.40  | 0.69 | 0.93 | -0.05 |
| VLPFC | CH18 | -0.01(-0.22±0.32) | -0.03(-0.35±0.16) | 1.32  | 0.19 | 0.66 | 0.18  |
| VLPFC | CH24 | 0.00(-0.43±0.24)  | 0.14(-0.29±0.52)  | 1.39  | 0.17 | 0.66 | -0.19 |
| VLPFC | CH25 | 0.29(-0.38±0.88)  | 0.17(-0.11±0.80)  | -0.37 | 0.71 | 0.93 | 0.05  |
| VLPFC | CH28 | -0.04±0.30        | -0.07±0.30        | 0.14  | 0.89 | 0.93 | 0.03  |
| VLPFC | CH35 | -0.15±0.65        | -0.12±0.49        | -0.15 | 0.88 | 0.93 | -0.03 |
| VLPFC | CH39 | 0.29±1.05         | 0.18±0.66         | 0.41  | 0.69 | 0.93 | 0.10  |
| VLPFC | CH45 | 0.15(-0.20±0.39)  | -0.08(-0.42±0.40) | -1.02 | 0.31 | 0.66 | 0.14  |
| FPC   | CH21 | 0.09±0.63         | -0.03±0.55        | 1.19  | 0.24 | 0.66 | 0.28  |
| FPC   | CH22 | 0.20±0.87         | 0.11±0.68         | 0.54  | 0.59 | 0.93 | 0.13  |
| FPC   | CH30 | -0.07±0.37        | -0.03±0.37        | -0.09 | 0.93 | 0.95 | -0.02 |
| FPC   | CH31 | -0.04±0.45        | -0.08±0.45        | -0.16 | 0.87 | 0.93 | -0.04 |
| FPC   | CH32 | -0.09±0.3         | -0.07±0.29        | -0.15 | 0.88 | 0.93 | -0.04 |
| FPC   | CH33 | -0.11±0.37        | -0.09±0.33        | 0.02  | 0.98 | 0.98 | 0.01  |
| FPC   | CH40 | 0.07(-0.28±0.40)  | 0.14(-0.12±1.52)  | 1.64  | 0.10 | 0.66 | -0.22 |

|     |      |                   |                   |       |      |      |      |
|-----|------|-------------------|-------------------|-------|------|------|------|
| FPC | CH41 | 0.16(-0.09±0.46)  | -0.02(-0.39±0.62) | -0.84 | 0.40 | 0.73 | 0.11 |
| FPC | CH42 | 0.15±0.77         | 0.13±0.54         | 0.23  | 0.82 | 0.93 | 0.05 |
| FPC | CH43 | 0.19(-0.27±0.63)  | 0.04(-0.38±0.55)  | -0.78 | 0.43 | 0.75 | 0.11 |
| FPC | CH44 | 0.04(-0.41±0.47)  | -0.04(-0.49±0.48) | -0.43 | 0.67 | 0.93 | 0.06 |
| OFC | CH51 | -0.29(-0.57±0.35) | -0.20(-0.63±0.11) | 0.31  | 0.76 | 0.93 | 0.04 |
| OFC | CH52 | -0.07±0.52        | -0.24±0.50        | 1.82  | 0.07 | 0.66 | 0.42 |
| OFC | CH53 | -0.14±0.54        | -0.2±0.43         | 1.03  | 0.31 | 0.66 | 0.24 |
| OFC | CH54 | 0.09±0.58         | 0.01±0.48         | 0.85  | 0.4  | 0.73 | 0.20 |

**Scheme 2.** Oxygenated hemoglobin concentration changes in the HC and SD performing 1-back.

| Brain regions | Channel | SD group          | HC group          | t/Z   | P-value | FDR  | Effect Size |
|---------------|---------|-------------------|-------------------|-------|---------|------|-------------|
| DLPFC         | CH1     | -0.12±0.32        | -0.01±0.28        | -1.55 | 0.13    | 0.55 | -0.36       |
| DLPFC         | CH2     | -0.06±0.37        | 0.07±0.31         | -1.83 | 0.07    | 0.55 | -0.43       |
| DLPFC         | CH3     | -0.06(-0.40±0.17) | -0.10(-0.35±0.12) | -0.25 | 0.80    | 0.88 | 0.03        |
| DLPFC         | CH4     | -0.10±0.42        | -0.01±0.26        | -1.14 | 0.26    | 0.67 | -0.26       |
| DLPFC         | CH5     | -0.00(-0.34-0.34) | -0.07(-0.34-0.35) | -0.18 | 0.86    | 0.90 | 0.02        |
| DLPFC         | CH7     | 0.21(-0.31-0.89)  | 0.07(-0.34-0.57)  | -0.61 | 0.54    | 0.83 | 0.08        |
| DLPFC         | CH8     | 0.07(-0.21±0.26)  | 0.17(-0.06±0.43)  | 2.06  | 0.04    | 0.55 | -0.28       |
| DLPFC         | CH9     | -0.11(-0.37±0.16) | 0.02(-0.14±0.19)  | 1.56  | 0.12    | 0.55 | -0.21       |
| DLPFC         | CH10    | 0.06±0.38         | 0.1±0.49          | -0.23 | 0.82    | 0.88 | -0.05       |
| DLPFC         | CH11    | -0.04(-0.23±0.15) | 0.03(-0.24±0.16)  | 0.24  | 0.81    | 0.88 | -0.03       |
| DLPFC         | CH12    | -0.02±0.36        | -0.05±0.25        | -0.11 | 0.91    | 0.93 | -0.03       |
| DLPFC         | CH13    | -0.04(-0.30±0.30) | -0.15(-0.30±0.04) | -1.48 | 0.14    | 0.55 | 0.20        |
| DLPFC         | CH14    | 0.01±0.42         | -0.07±0.32        | 0.42  | 0.67    | 0.87 | 0.10        |

|       |      |                  |                   |       |      |      |       |
|-------|------|------------------|-------------------|-------|------|------|-------|
| DLPFC | CH19 | 0.09±0.54        | -0.06±0.43        | 1.57  | 0.12 | 0.55 | 0.37  |
| DLPFC | CH23 | 0.28(-0.03-0.67) | 0.22(-0.20-0.60)  | -0.57 | 0.57 | 0.85 | 0.08  |
| DLPFC | CH29 | 0.15(-0.18±0.40) | 0.03(-0.22±0.30)  | -1.02 | 0.31 | 0.67 | 0.14  |
| DLPFC | CH34 | 0.15(-0.34±0.30) | -0.05(-0.27±0.23) | -0.50 | 0.62 | 0.86 | 0.07  |
| DLPFC | CH50 | 0.01(-0.36±0.36) | -0.16(-0.48±0.22) | -0.98 | 0.33 | 0.67 | 0.13  |
| DLPFC | CH55 | 0.46±0.81        | 0.32±0.88         | 0.32  | 0.75 | 0.88 | 0.08  |
| VLPFC | CH17 | 0.04(-0.37±0.44) | 0.10(-0.14±0.25)  | 0.27  | 0.79 | 0.88 | -0.04 |
| VLPFC | CH18 | 0.15(-0.32±0.44) | -0.02(-0.31±0.37) | 0.51  | 0.61 | 0.86 | 0.07  |
| VLPFC | CH24 | 0.22(-0.22-0.62) | 0.23(-0.10-0.80)  | 0.80  | 0.43 | 0.71 | -0.11 |
| VLPFC | CH25 | 0.65(0.28±0.99)  | 0.54(-0.11±0.97)  | -1.00 | 0.32 | 0.67 | 0.14  |
| VLPFC | CH28 | 0.07±0.38        | -0.05±0.35        | 1.07  | 0.29 | 0.67 | 0.25  |
| VLPFC | CH35 | 0.20(-0.33±0.55) | 0.17(-0.17±0.46)  | -0.45 | 0.65 | 0.87 | 0.06  |
| VLPFC | CH39 | 0.58(0.16-1.49)  | 0.27(-0.09-1.07)  | -1.36 | 0.18 | 0.65 | 0.18  |
| VLPFC | CH45 | 0.5±0.63         | 0.27±0.88         | 1.05  | 0.3  | 0.67 | 0.25  |
| FPC   | CH20 | 0.36(0.12±0.82)  | 0.07(-0.38±0.47)  | -1.93 | 0.05 | 0.55 | 0.26  |
| FPC   | CH21 | 0.07(-0.28±0.37) | 0.05(-0.37±0.56)  | -0.09 | 0.93 | 0.93 | 0.01  |
| FPC   | CH22 | 0.35(-0.03±0.71) | 0.20(-0.28±0.69)  | -0.92 | 0.36 | 0.67 | 0.13  |
| FPC   | CH30 | 0.10±0.47        | -0.01±0.46        | 0.86  | 0.40 | 0.71 | 0.20  |
| FPC   | CH31 | 0.20(-0.06±0.45) | 0.12(-0.25±0.38)  | -1.18 | 0.24 | 0.67 | 0.16  |
| FPC   | CH32 | 0.04±0.44        | 0.00±0.27         | 0.30  | 0.76 | 0.88 | 0.07  |
| FPC   | CH33 | 0.09±0.49        | -0.02±0.40        | 0.82  | 0.42 | 0.71 | 0.19  |
| FPC   | CH40 | 0.28(-0.20-0.57) | 0.40(-0.18-0.76)  | 0.91  | 0.36 | 0.67 | -0.12 |
| FPC   | CH41 | 0.35(-0.23±0.83) | 0.15(-0.22±0.69)  | -1.03 | 0.30 | 0.67 | 0.14  |
| FPC   | CH42 | 0.07±0.38        | 0.32±0.81         | 0.28  | 0.78 | 0.88 | 0.06  |

|     |      |                  |                   |       |      |      |      |
|-----|------|------------------|-------------------|-------|------|------|------|
| FPC | CH43 | 0.43(-0.13-0.74) | 0.00(-0.22-0.74)  | -1.28 | 0.20 | 0.66 | 0.17 |
| FPC | CH44 | 0.28±0.99        | 0.11±0.99         | 0.63  | 0.53 | 0.83 | 0.15 |
| OFC | CH51 | 0.07(-0.28±0.52) | -0.14(-0.48±0.20) | -1.58 | 0.11 | 0.55 | 0.21 |
| OFC | CH52 | 0.24(-0.13±0.60) | 0.09(-0.50±0.35)  | -1.71 | 0.09 | 0.55 | 0.23 |
| OFC | CH53 | 0.15(-0.12±0.45) | -0.05(-0.30±0.27) | -1.77 | 0.08 | 0.55 | 0.24 |
| OFC | CH54 | 0.47(0.21±1.09)  | 0.16(-0.16±0.85)  | -1.57 | 0.12 | 0.55 | 0.21 |

**Scheme 3.** Oxygenated hemoglobin concentration changes in the HC and SD performing 2-back.

| Brain regions | Channel | SD group          | HC group          | t/Z   | P-value          | FDR              | Effect Size |
|---------------|---------|-------------------|-------------------|-------|------------------|------------------|-------------|
| DLPFC         | CH1     | -0.18±0.42        | -0.02±0.26        | -1.77 | 0.08             | 0.57             | -0.41       |
| DLPFC         | CH2     | -0.09(-0.37±0.14) | -0.03(-0.17±0.38) | 1.98  | 0.05             | 0.54             | -0.27       |
| DLPFC         | CH3     | -0.13±0.43        | -0.04±0.32        | -0.13 | 0.90             | 0.93             | -0.03       |
| DLPFC         | CH4     | -0.19±0.38        | 0.02±0.32         | -2.48 | 0.02             | 0.43             | -0.58       |
| DLPFC         | CH5     | 0.07(-0.08±0.37)  | 0.07(-0.45±0.35)  | -1.01 | 0.31             | 0.74             | 0.14        |
| DLPFC         | CH7     | 0.30(0.06-0.88)   | 0.29(-0.17-0.86)  | -0.36 | 0.72             | 0.93             | 0.05        |
| DLPFC         | CH8     | -0.15±0.35        | 0.18±0.39         | -3.94 | <b>&lt;0.01*</b> | <b>&lt;0.01*</b> | -0.92       |
| DLPFC         | CH9     | -0.18±0.40        | 0.01±0.43         | -2.02 | 0.05             | 0.54             | -0.47       |
| DLPFC         | CH10    | -0.09±0.47        | 0.09±0.57         | -1.45 | 0.15             | 0.69             | -0.34       |
| DLPFC         | CH11    | -0.08(-0.29±0.08) | 0.00(-0.18±0.25)  | 1.58  | 0.11             | 0.68             | -0.21       |
| DLPFC         | CH12    | -0.08(-0.27±0.12) | -0.04(-0.23±0.15) | 0.72  | 0.47             | 0.78             | -0.10       |
| DLPFC         | CH13    | -0.16(-0.49±0.23) | -0.13(-0.38±0.09) | 0.65  | 0.52             | 0.83             | -0.09       |
| DLPFC         | CH14    | -0.04(-0.34±0.09) | -0.06(-0.27±0.20) | 0.78  | 0.43             | 0.78             | -0.11       |
| DLPFC         | CH19    | 0.03(-0.44-0.26)  | 0.02(-0.16-0.34)  | 0.27  | 0.79             | 0.93             | -0.04       |
| DLPFC         | CH23    | 0.50(0.01±0.95)   | 0.41(-0.06±1.15)  | -0.48 | 0.63             | 0.92             | 0.07        |

|       |      |                   |                  |       |      |      |       |
|-------|------|-------------------|------------------|-------|------|------|-------|
| DLPFC | CH29 | 0.05±0.48         | 0.11±0.61        | -0.73 | 0.47 | 0.78 | -0.17 |
| DLPFC | CH34 | -0.01±0.41        | 0.05±0.46        | -0.74 | 0.46 | 0.78 | -0.17 |
| DLPFC | CH50 | -0.04±0.65        | -0.13±0.68       | 0.11  | 0.91 | 0.93 | 0.03  |
| DLPFC | CH55 | 0.94±1.08         | 0.58±1.16        | 1.25  | 0.22 | 0.74 | 0.29  |
| VLPFC | CH17 | -0.01(-0.36-0.26) | 0.07(-0.12-0.23) | 1.06  | 0.29 | 0.74 | -0.14 |
| VLPFC | CH18 | 0.08(-0.23±0.31)  | 0.11(-0.24±0.43) | 0.29  | 0.78 | 0.93 | -0.04 |
| VLPFC | CH24 | 0.43±0.97         | 0.64±0.68        | -1.54 | 0.13 | 0.69 | -0.36 |
| VLPFC | CH25 | 1.07(0.43±1.66)   | 0.73(0.31±1.40)  | -1.10 | 0.27 | 0.74 | 0.15  |
| VLPFC | CH28 | 0.01±0.41         | -0.07±0.44       | 0.31  | 0.76 | 0.93 | 0.07  |
| VLPFC | CH35 | 0.14±0.58         | 0.14±0.72        | -0.17 | 0.87 | 0.93 | -0.04 |
| VLPFC | CH39 | 1.29±1.12         | 1.00±1.1         | 0.93  | 0.36 | 0.74 | 0.22  |
| VLPFC | CH45 | 0.51(0.13±1.20)   | 0.28(-0.21±0.74) | -1.80 | 0.07 | 0.57 | 0.24  |
| FPC   | CH20 | 0.46(-0.05±0.68)  | 0.31(-0.12±0.93) | -0.02 | 0.99 | 0.99 | 0.00  |
| FPC   | CH21 | 0.22(-0.04-0.48)  | 0.11(-0.42-0.48) | -0.95 | 0.34 | 0.74 | 0.13  |
| FPC   | CH22 | 0.73±0.88         | 0.56±0.87        | 0.93  | 0.35 | 0.74 | 0.22  |
| FPC   | CH30 | 0.03±0.42         | 0.03±0.43        | -0.32 | 0.75 | 0.93 | -0.07 |
| FPC   | CH31 | 0.16±0.54         | 0.04±0.63        | 0.44  | 0.66 | 0.92 | 0.10  |
| FPC   | CH32 | 0.00±0.35         | -0.01±0.39       | -0.19 | 0.85 | 0.93 | -0.05 |
| FPC   | CH33 | -0.05±0.41        | 0.03±0.47        | -1.03 | 0.31 | 0.74 | -0.24 |
| FPC   | CH40 | 0.37±0.63         | 0.63±0.98        | -1.33 | 0.19 | 0.74 | -0.31 |
| FPC   | CH41 | 0.66±1.04         | 0.47±0.85        | 0.89  | 0.38 | 0.74 | 0.21  |
| FPC   | CH42 | 0.67±0.89         | 0.56±0.78        | 0.46  | 0.65 | 0.92 | 0.11  |
| FPC   | CH43 | 0.61(0.09±1.23)   | 0.32(-0.21±1.20) | -1.40 | 0.16 | 0.69 | 0.19  |
| FPC   | CH44 | 0.56±1.11         | 0.27±1.08        | 1.10  | 0.28 | 0.74 | 0.26  |

|     |      |                  |                   |       |      |      |      |
|-----|------|------------------|-------------------|-------|------|------|------|
| OFC | CH51 | 0.10(-0.47±0.35) | -0.02(-0.48±0.40) | -0.12 | 0.90 | 0.93 | 0.02 |
| OFC | CH52 | 0.18(-0.03±0.40) | 0.18(-0.03±0.40)  | -0.92 | 0.36 | 0.74 | 0.13 |
| OFC | CH53 | 0.13(-0.13±0.46) | 0.01(-0.29±0.40)  | -0.45 | 0.65 | 0.92 | 0.06 |
| OFC | CH54 | 0.76±0.8         | 0.7±0.83          | 0.25  | 0.81 | 0.93 | 0.06 |

**Scheme 4.** Deoxygenated hemoglobin concentration changes in the HC and SD performing 0-back.

| Brain re-<br>gions | Channel | SD group          | HC group          | t/Z   | P-<br>value | FDR  | Effect<br>Size |
|--------------------|---------|-------------------|-------------------|-------|-------------|------|----------------|
| DLPFC              | CH1     | 0.04(-0.05±0.11)  | 0.02(-0.04±0.10)  | -0.34 | 0.73        | 0.91 | 0.05           |
| DLPFC              | CH2     | 0.05(-0.06±0.15)  | 0.03(-0.07±0.28)  | 0.53  | 0.60        | 0.91 | -0.07          |
| DLPFC              | CH3     | -0.01(-0.05±0.17) | -0.02(-0.12±0.08) | -1.49 | 0.14        | 0.76 | 0.20           |
| DLPFC              | CH4     | 0.05±0.14         | 0.03±0.10         | -0.51 | 0.61        | 0.91 | -0.12          |
| DLPFC              | CH5     | 0.03(-0.14±0.22)  | -0.02(-0.25±0.16) | -0.83 | 0.41        | 0.84 | 0.11           |
| DLPFC              | CH7     | -0.16(-0.46±0.29) | -0.14(-0.34±0.08) | 0.36  | 0.72        | 0.91 | -0.05          |
| DLPFC              | CH8     | -0.07(-0.16±0.12) | 0.04(-0.12±0.15)  | 1.27  | 0.20        | 0.76 | -0.17          |
| DLPFC              | CH9     | -0.01(-0.11±0.12) | 0.01(-0.07±0.13)  | 0.41  | 0.69        | 0.91 | -0.06          |
| DLPFC              | CH10    | -0.06±0.22        | -0.01±0.20        | -1.08 | 0.28        | 0.80 | -0.25          |
| DLPFC              | CH11    | 0.04±0.16         | 0.07±0.11         | -1.28 | 0.2         | 0.76 | -0.30          |
| DLPFC              | CH12    | 0.03±0.14         | 0.03±0.09         | -0.93 | 0.36        | 0.84 | -0.22          |
| DLPFC              | CH13    | 0.01(-0.09-0.12)  | 0.01(-0.04-0.10)  | 0.12  | 0.90        | 0.96 | -0.02          |
| DLPFC              | CH14    | 0.02(-0.08±0.13)  | -0.03(-0.19±0.09) | -2.18 | 0.03        | 0.76 | 0.29           |
| DLPFC              | CH19    | 0.08±0.35         | -0.01±0.24        | 1.09  | 0.28        | 0.80 | 0.25           |
| DLPFC              | CH23    | 0.09(-0.18±0.32)  | 0.05(-0.10±0.19)  | -0.32 | 0.75        | 0.91 | 0.04           |
| DLPFC              | CH29    | -0.12(-0.18±0.05) | 0.00(-0.08±0.08)  | 2.11  | 0.04        | 0.76 | -0.29          |
| DLPFC              | CH34    | -0.03±0.15        | 0.02±0.15         | -1.30 | 0.20        | 0.76 | -0.30          |

|       |      |                   |                   |       |      |      |       |
|-------|------|-------------------|-------------------|-------|------|------|-------|
| DLPFC | CH50 | -0.04±0.27        | -0.05±0.16        | 0.50  | 0.62 | 0.91 | 0.12  |
| DLPFC | CH55 | -0.01(-0.26±0.19) | 0.07(-0.12±0.26)  | 1.23  | 0.22 | 0.76 | -0.17 |
| VLPFC | CH17 | 0±0.16            | 0.01±0.15         | -0.42 | 0.68 | 0.91 | -0.10 |
| VLPFC | CH18 | 0.00(-0.13±0.13)  | -0.06(-0.18±0.05) | -1.37 | 0.17 | 0.76 | 0.19  |
| VLPFC | CH24 | -0.03(-0.43-0.15) | -0.06(-0.19-0.10) | 0.22  | 0.83 | 0.92 | -0.03 |
| VLPFC | CH25 | 0.08(-0.18-0.42)  | -0.03(-0.15-0.26) | -0.25 | 0.80 | 0.92 | 0.03  |
| VLPFC | CH28 | -0.05(-0.10±0.14) | -0.03(-0.12±0.07) | -0.03 | 0.98 | 0.98 | 0.00  |
| VLPFC | CH35 | 0.06(-0.11-0.16)  | 0.03(-0.02-0.15)  | 0.08  | 0.94 | 0.96 | -0.01 |
| VLPFC | CH39 | 0.00(-0.26±0.20)  | 0.06(-0.10±0.32)  | 1.26  | 0.21 | 0.76 | -0.17 |
| VLPFC | CH45 | -0.04±0.40        | 0.06±0.33         | -1.39 | 0.17 | 0.76 | -0.32 |
| FPC   | CH20 | 0.05(-0.39±0.20)  | -0.06(-0.25±0.18) | 0.08  | 0.94 | 0.96 | -0.01 |
| FPC   | CH21 | 0.03±0.41         | -0.05±0.25        | 1.23  | 0.22 | 0.76 | 0.29  |
| FPC   | CH22 | 0.01±0.33         | -0.05±0.30        | 1.40  | 0.17 | 0.76 | 0.325 |
| FPC   | CH30 | 0.03±0.17         | 0.04±0.14         | 0.56  | 0.57 | 0.91 | 0.13  |
| FPC   | CH31 | -0.02±0.19        | 0.02±0.16         | -0.89 | 0.38 | 0.84 | -0.21 |
| FPC   | CH32 | 0.04±0.15         | 0.02±0.14         | -0.31 | 0.76 | 0.91 | -0.07 |
| FPC   | CH33 | 0.01±0.17         | 0.03±0.13         | -0.85 | 0.4  | 0.84 | -0.20 |
| FPC   | CH40 | -0.11(-0.33-0.12) | -0.15(-2.13-0.07) | -1.21 | 0.23 | 0.76 | 0.16  |
| FPC   | CH41 | -0.04(-0.42±0.20) | -0.05(-0.19±0.16) | 0.37  | 0.71 | 0.91 | -0.05 |
| FPC   | CH42 | -0.02(-0.30±0.21) | 0.11(-0.26±0.16)  | -0.70 | 0.49 | 0.88 | 0.09  |
| FPC   | CH43 | -0.05(-0.27-0.20) | 0.03(-0.12-0.38)  | 0.98  | 0.33 | 0.84 | -0.13 |
| FPC   | CH44 | -0.06(-0.27±0.31) | 0.01(-0.19±0.19)  | 0.73  | 0.47 | 0.88 | -0.10 |
| OFC   | CH51 | -0.01(-0.14±0.18) | -0.01(-0.12±0.08) | -0.24 | 0.81 | 0.92 | 0.03  |
| OFC   | CH52 | -0.03(-0.19±0.15) | -0.02(-0.38±0.09) | -0.74 | 0.46 | 0.88 | 0.10  |



|     |      |                   |                  |      |      |      |       |
|-----|------|-------------------|------------------|------|------|------|-------|
| OFC | CH53 | -0.11±0.19        | -0.08±0.17       | 0.31 | 0.76 | 0.91 | 0.07  |
| OFC | CH54 | -0.05(-0.22±0.10) | 0.00(-0.16±0.14) | 0.86 | 0.39 | 0.84 | -0.12 |

**Scheme 5.** Deoxygenated hemoglobin concentration changes in the HC and SD performing 1-back.

| Brain re-<br>gions | Channel | SD group          | HC group          | t/Z   | <i>P</i> -<br>value | FDR  | Effect<br>Size |
|--------------------|---------|-------------------|-------------------|-------|---------------------|------|----------------|
| DLPFC              | CH1     | -0.03(-0.12±0.13) | -0.02(-0.10±0.03) | -0.84 | 0.40                | 0.91 | 0.11           |
| DLPFC              | CH2     | 0.03(-0.12±0.13)  | 0.01(-0.07±0.08)  | 0.60  | 0.55                | 0.91 | -0.08          |
| DLPFC              | CH3     | -0.01(-0.08-0.15) | -0.03(-0.11-0.08) | -0.65 | 0.51                | 0.91 | 0.09           |
| DLPFC              | CH4     | -0.02(-0.10±0.08) | -0.01(-0.05±0.08) | 0.65  | 0.51                | 0.91 | -0.09          |
| DLPFC              | CH5     | -0.03(-0.21±0.15) | -0.07(-0.23±0.06) | -1.13 | 0.26                | 0.91 | 0.15           |
| DLPFC              | CH7     | -0.08(-0.30±0.27) | -0.13(-0.29±0.09) | -0.74 | 0.46                | 0.91 | 0.10           |
| DLPFC              | CH8     | -0.04(-0.21-0.06) | 0.02(-0.14-0.12)  | 1.38  | 0.17                | 0.91 | -0.20          |
| DLPFC              | CH9     | -0.06(-0.16-0.03) | -0.03(-0.13-0.05) | 0.90  | 0.37                | 0.91 | -0.12          |
| DLPFC              | CH10    | -0.07±0.20        | -0.05±0.19        | -0.47 | 0.64                | 0.93 | -0.11          |
| DLPFC              | CH11    | -0.04(-0.14±0.02) | 0.02(-0.06±0.11)  | 2.37  | 0.02                | 0.43 | -0.32          |
| DLPFC              | CH12    | -0.03(-0.11±0.12) | 0.00(-0.08±0.06)  | 0.67  | 0.51                | 0.91 | -0.09          |
| DLPFC              | CH13    | -0.03(-0.12±0.05) | 0.03(-0.09±0.10)  | 0.86  | 0.39                | 0.91 | -0.12          |
| DLPFC              | CH14    | 0.00±0.22         | -0.04±0.17        | 0.93  | 0.36                | 0.91 | 0.22           |
| DLPFC              | CH19    | -0.02(-0.10-0.27) | -0.06(-0.19-0.05) | -1.38 | 0.17                | 0.91 | 0.19           |
| DLPFC              | CH23    | 0.03(-0.19±0.25)  | 0.02(-0.21±0.19)  | 0.31  | 0.76                | 0.96 | 0.04           |
| DLPFC              | CH29    | -0.09(-0.25±0.00) | -0.07(-0.17±0.03) | 1.22  | 0.22                | 0.91 | 0.16           |
| DLPFC              | CH34    | -0.05(-0.20-0.04) | 0.01(-0.16-0.09)  | 0.82  | 0.41                | 0.91 | -0.11          |
| DLPFC              | CH50    | -0.11(-0.29±0.02) | -0.12(-0.24±0.05) | 0.15  | 0.88                | 0.97 | -0.02          |
| DLPFC              | CH55    | 0.05±0.46         | 0.07±0.46         | 0.26  | 0.80                | 0.96 | 0.06           |

|       |      |                   |                   |       |                  |                  |       |
|-------|------|-------------------|-------------------|-------|------------------|------------------|-------|
| VLPFC | CH17 | -0.08(-0.25±0.16) | -0.08(-0.17±0.05) | -0.20 | 0.84             | 0.97             | 0.03  |
| VLPFC | CH18 | -0.01(-0.22±0.18) | -0.08(-0.20±0.03) | -1.31 | 0.19             | 0.91             | 0.18  |
| VLPFC | CH24 | -0.22±0.61        | -0.10±0.42        | -0.88 | 0.38             | 0.91             | -0.21 |
| VLPFC | CH25 | -0.10±0.50        | -0.05±0.63        | 0.07  | 0.94             | 0.98             | 0.02  |
| VLPFC | CH28 | -0.01±0.17        | -0.06±0.15        | 0.61  | 0.55             | 0.91             | 0.14  |
| VLPFC | CH35 | -0.02(-0.12-0.12) | 0.01(-0.11-0.18)  | 0.46  | 0.65             | 0.93             | -0.06 |
| VLPFC | CH39 | 0.04(-0.26±0.45)  | 0.11(-0.04±0.32)  | 0.89  | 0.37             | 0.91             | -0.12 |
| VLPFC | CH45 | 0.14(-0.09±0.37)  | 0.12(-0.11±0.26)  | -0.50 | 0.62             | 0.93             | 0.07  |
| FPC   | CH20 | -0.01(-0.27-0.31) | 0.02(-0.28-0.26)  | 0.03  | 0.98             | 0.98             | -0.00 |
| FPC   | CH21 | -0.04±0.31        | -0.12±0.29        | 1.15  | 0.25             | 0.91             | 0.27  |
| FPC   | CH22 | -0.02(-0.19±0.23) | -0.09(-0.37±0.13) | -1.57 | 0.12             | 0.91             | 0.21  |
| FPC   | CH30 | -0.03±0.2         | -0.03±0.25        | 0.03  | 0.98             | 0.98             | 0.01  |
| FPC   | CH31 | -0.03(-0.15±0.08) | 0.00(-0.16±0.13)  | 0.72  | 0.47             | 0.91             | -0.10 |
| FPC   | CH32 | 0.00±0.22         | -0.01±0.14        | -0.39 | 0.70             | 0.96             | -0.09 |
| FPC   | CH33 | -0.03(-0.11±0.09) | -0.03(-0.12±0.10) | 0.04  | 0.97             | 0.98             | -0.01 |
| FPC   | CH40 | -0.06(-0.21-0.10) | -0.29(-0.75—0.11) | -3.84 | <b>&lt; 0.01</b> | <b>&lt; 0.01</b> | 0.52  |
| FPC   | CH41 | -0.03(-0.31±0.20) | -0.09(-0.21±0.17) | -0.25 | 0.80             | 0.96             | 0.03  |
| FPC   | CH42 | 0.09(-0.23±0.32)  | -0.05(-0.28±0.10) | -1.81 | 0.07             | 0.91             | 0.25  |
| FPC   | CH43 | -0.01(-0.22±0.34) | 0.05(-0.19±0.18)  | 0.36  | 0.72             | 0.96             | -0.05 |
| FPC   | CH44 | -0.16(-0.38±0.20) | -0.06(-0.34±0.18) | 0.57  | 0.57             | 0.91             | -0.08 |
| OFC   | CH51 | -0.04±0.27        | -0.07±0.21        | 1.09  | 0.28             | 0.91             | 0.25  |
| OFC   | CH52 | -0.03±0.27        | -0.13±0.24        | 1.69  | 0.10             | 0.91             | 0.39  |
| OFC   | CH53 | -0.04(-0.16-0.08) | -0.05(-0.16-0.04) | -0.29 | 0.78             | 0.96             | 0.04  |
| OFC   | CH54 | -0.00(-0.13-0.23) | 0.04(-0.18-0.20)  | -0.18 | 0.86             | 0.97             | 0.02  |

---

Note : HbO is more sensitive and dependable than HbR, so only the results of HbR were discussed in this study.

**Scheme 6.** Deoxygenated hemoglobin concentration changes in the HC and SD performing 2-back.

| Brain re-<br>gions | Channel | SD group           | HC group          | t/Z   | P-value         | FDR         | Effect Size |
|--------------------|---------|--------------------|-------------------|-------|-----------------|-------------|-------------|
| DLPFC              | CH1     | 0.01(-0.08±0.13)   | -0.03(-0.09±0.02) | -1.80 | 0.07            | 0.43        | 0.25        |
| DLPFC              | CH2     | 0.03(-0.08±0.13)   | -0.01(-0.06±0.12) | -0.20 | 0.84            | 0.95        | 0.03        |
| DLPFC              | CH3     | 0.04(-0.07±0.20)   | -0.07(-0.24±0.01) | -3.30 | <b>&lt;0.01</b> | <b>0.04</b> | 0.45        |
| DLPFC              | CH4     | -0.02(-0.09±0.08)  | -0.02(-0.09±0.06) | -0.68 | 0.50            | 0.80        | 0.09        |
| DLPFC              | CH5     | 0.02±0.42          | -0.07±0.26        | 1.39  | 0.17            | 0.61        | 0.32        |
| DLPFC              | CH7     | -0.05(-0.39±0.37)  | -0.06(-0.31±0.19) | 0.16  | 0.88            | 0.95        | -0.02       |
| DLPFC              | CH8     | -0.13(-0.23±0.05)  | 0.05(-0.12±0.14)  | 2.87  | 0.004           | 0.09        | -0.39       |
| DLPFC              | CH9     | -0.04±0.21         | -0.04±0.17        | -0.17 | 0.86            | 0.95        | -0.04       |
| DLPFC              | CH10    | -0.17(-0.27±-0.04) | -0.13(-0.32±0.00) | 0.20  | 0.84            | 0.95        | -0.03       |
| DLPFC              | CH11    | -0.01(-0.08±0.13)  | 0.01(-0.07±0.13)  | 0.68  | 0.50            | 0.80        | -0.09       |
| DLPFC              | CH12    | 0.00±0.22          | -0.04±0.11        | 0.56  | 0.58            | 0.82        | 0.13        |
| DLPFC              | CH13    | -0.01(-0.06±0.16)  | -0.05(-0.14±0.05) | -1.93 | 0.05            | 0.36        | 0.26        |
| DLPFC              | CH14    | 0.03±0.19          | -0.09±0.18        | 2.89  | 0.01            | 0.14        | 0.67        |
| DLPFC              | CH19    | -0.12(-0.22±0.24)  | -0.09(-0.19±0.05) | 0.05  | 0.96            | 0.97        | -0.01       |
| DLPFC              | CH23    | 0.13±0.41          | 0.05±0.38         | 1.14  | 0.26            | 0.61        | 0.26        |
| DLPFC              | CH29    | -0.13(-0.26±-0.06) | -0.09(-0.22±0.04) | 1.28  | 0.20            | 0.61        | -0.17       |
| DLPFC              | CH34    | -0.12±0.24         | -0.12±0.21        | 0.04  | 0.97            | 0.97        | 0.01        |
| DLPFC              | CH50    | -0.12(-0.35±0.11)  | -0.07(-0.20±0.01) | -0.07 | 0.94            | 0.97        | 0.01        |
| DLPFC              | CH55    | -0.07(-0.35±0.18)  | 0.06(-0.31±0.30)  | 1.04  | 0.30            | 0.61        | -0.14       |
| VLPFC              | CH17    | -0.08±0.27         | -0.11±0.17        | 0.55  | 0.59            | 0.82        | 0.13        |
| VLPFC              | CH18    | 0.00(-0.15±0.23)   | -0.14(-0.29±0.08) | -2.12 | 0.03            | 0.32        | 0.29        |
| VLPFC              | CH24    | -0.12(-0.38±0.08)  | -0.21(-0.37±0.11) | -0.21 | 0.83            | 0.95        | 0.03        |

|       |      |                   |                   |       |      |      |       |
|-------|------|-------------------|-------------------|-------|------|------|-------|
| VLPFC | CH25 | -0.12(-0.43-0.23) | -0.06(-0.34-0.25) | 0.58  | 0.56 | 0.82 | -0.08 |
| VLPFC | CH28 | 0.00±0.22         | -0.10±0.15        | 2.11  | 0.04 | 0.34 | 0.49  |
| VLPFC | CH35 | 0.01(-0.16±0.21)  | -0.03(-0.17±0.09) | -1.29 | 0.20 | 0.61 | 0.18  |
| VLPFC | CH39 | -0.13(-0.46±0.18) | -0.03(-0.26±0.27) | 1.29  | 0.20 | 0.61 | -0.18 |
| VLPFC | CH45 | 0.07±0.49         | 0.13±0.50         | -0.66 | 0.51 | 0.80 | -0.15 |
| FPC   | CH20 | -0.02(-0.29±0.32) | -0.10(-0.27±0.19) | -0.34 | 0.73 | 0.95 | 0.05  |
| FPC   | CH21 | -0.07±0.40        | -0.14±0.30        | 1.22  | 0.23 | 0.61 | 0.28  |
| FPC   | CH22 | 0.01±0.47         | -0.13±0.46        | 1.60  | 0.11 | 0.53 | 0.37  |
| FPC   | CH30 | -0.01±0.23        | -0.04±0.27        | 0.80  | 0.43 | 0.80 | 0.19  |
| FPC   | CH31 | -0.05(-0.14±0.06) | -0.09(-0.20±0.07) | -0.64 | 0.52 | 0.80 | 0.09  |
| FPC   | CH32 | 0.02±0.21         | -0.05±0.17        | 1.10  | 0.28 | 0.61 | 0.26  |
| FPC   | CH33 | -0.04±0.23        | -0.07±0.23        | 0.76  | 0.45 | 0.80 | 0.18  |
| FPC   | CH40 | -0.16(-0.37±0.03) | -0.26(-1.13±0.06) | -1.67 | 0.10 | 0.53 | 0.23  |
| FPC   | CH41 | -0.24(-0.50-0.12) | -0.09(-0.33-0.11) | 1.20  | 0.23 | 0.61 | -0.16 |
| FPC   | CH42 | -0.11±0.47        | -0.12±0.52        | 0.32  | 0.75 | 0.95 | 0.08  |
| FPC   | CH43 | -0.03(-0.27-0.29) | 0.07(-0.14-0.35)  | 0.97  | 0.33 | 0.65 | -0.13 |
| FPC   | CH44 | -0.02(-0.29±0.23) | 0.03(-0.26±0.18)  | 0.21  | 0.83 | 0.95 | -0.03 |
| OFC   | CH51 | -0.10±0.24        | -0.12±0.25        | 1.09  | 0.28 | 0.61 | 0.25  |
| OFC   | CH52 | -0.13(-0.27±0.00) | -0.19(-0.43±0.02) | -1.41 | 0.16 | 0.61 | 0.19  |
| OFC   | CH53 | -0.05(-0.23±0.05) | -0.06(-0.26±0.02) | -0.44 | 0.66 | 0.89 | 0.06  |
| OFC   | CH54 | -0.03(-0.17±0.16) | 0.12(-0.22±0.31)  | 1.07  | 0.29 | 0.61 | -0.14 |

Note : HbO is more sensitive and dependable than HbR, so only the results of HbR were discussed in this study.

**Scheme 7.** Total oxygenated hemoglobin concentration changes in the HC and SD performing 0-back.

| Brain re-<br>gions | Channel | SD group          | HC group          | t/Z   | <i>P</i> -value | FDR         | Effect Size |
|--------------------|---------|-------------------|-------------------|-------|-----------------|-------------|-------------|
| DLPFC              | CH1     | -0.15±0.46        | -0.09±0.32        | -0.63 | 0.53            | 0.85        | -0.15       |
| DLPFC              | CH2     | -0.12(-0.28~0.11) | 0.01(-0.21~0.42)  | 1.47  | 0.14            | 0.59        | -0.20       |
| DLPFC              | CH3     | -0.07(-0.38~0.20) | -0.15(-0.39~0.08) | -1.12 | 0.26            | 0.67        | 0.15        |
| DLPFC              | CH4     | -0.18±0.41        | -0.03±0.36        | -1.72 | 0.09            | 0.58        | -0.40       |
| DLPFC              | CH5     | 0.15±0.66         | -0.12±0.69        | 1.75  | 0.08            | 0.58        | 0.41        |
| DLPFC              | CH7     | 0.48±0.90         | 0.46±0.95         | 0.12  | 0.91            | 0.92        | 0.03        |
| DLPFC              | CH8     | -0.22(-0.66~0.14) | 0.17(-0.12~0.59)  | 3.72  | <b>&lt;0.01</b> | <b>0.01</b> | -0.50       |
| DLPFC              | CH9     | -0.27±0.49        | -0.07±0.49        | -1.76 | 0.08            | 0.58        | -0.41       |
| DLPFC              | CH10    | -0.23±0.54        | -0.08±0.60        | -1.15 | 0.25            | 0.67        | -0.27       |
| DLPFC              | CH11    | -0.11(-0.34~0.15) | -0.06(-0.19~0.35) | 1.61  | 0.11            | 0.58        | -0.22       |
| DLPFC              | CH12    | -0.10(-0.33~0.12) | -0.04(-0.33~0.15) | 0.33  | 0.74            | 0.89        | -0.05       |
| DLPFC              | CH13    | -0.08(-0.36~0.11) | -0.17(-0.38~0.02) | -0.47 | 0.64            | 0.87        | 0.06        |
| DLPFC              | CH14    | 0.00(-0.30~0.20)  | -0.14(-0.35~0.08) | -1.10 | 0.27            | 0.67        | 0.15        |
| DLPFC              | CH19    | -0.11(-0.52~0.56) | -0.08(-0.23~0.27) | -0.11 | 0.91            | 0.92        | 0.02        |
| DLPFC              | CH23    | 0.67(0.05~1.14)   | 0.40(0.00~1.14)   | -0.55 | 0.59            | 0.85        | 0.07        |
| DLPFC              | CH29    | -0.14±0.56        | -0.02±0.61        | -0.92 | 0.36            | 0.72        | -0.21       |
| DLPFC              | CH34    | -0.03(-0.37~0.17) | -0.07(-0.26~0.11) | 0.19  | 0.85            | 0.92        | -0.03       |
| DLPFC              | CH50    | -0.28(-0.60~0.42) | -0.11(-0.73~0.21) | 0.10  | 0.92            | 0.92        | -0.01       |
| DLPFC              | CH55    | 0.83±1.15         | 0.64±1.41         | 0.65  | 0.52            | 0.85        | 0.15        |
| VLPFC              | CH17    | -0.21±0.61        | -0.08±0.37        | -1.10 | 0.28            | 0.67        | -0.26       |
| VLPFC              | CH18    | -0.01(-0.24~0.39) | 0.01(-0.39~0.43)  | -0.33 | 0.74            | 0.89        | 0.05        |
| VLPFC              | CH24    | 0.20±1.00         | 0.47±0.67         | -1.39 | 0.17            | 0.65        | -0.32       |

|       |      |                   |                   |       |      |      |       |
|-------|------|-------------------|-------------------|-------|------|------|-------|
| VLPFC | CH25 | 0.87(0.36~1.47)   | 0.67(0.24~1.40)   | -0.59 | 0.56 | 0.85 | 0.08  |
| VLPFC | CH28 | -0.05±0.53        | -0.17±0.44        | 1.02  | 0.31 | 0.67 | 0.24  |
| VLPFC | CH35 | 0.07(-0.25~0.35)  | 0.14(-0.30~0.44)  | -0.33 | 0.74 | 0.89 | 0.05  |
| VLPFC | CH39 | 1.14±1.12         | 1.03±1.17         | 0.41  | 0.68 | 0.89 | 0.10  |
| VLPFC | CH45 | 0.71(0.14~1.20)   | 0.39(-0.20~0.91)  | -1.58 | 0.11 | 0.58 | 0.21  |
| FPC   | CH21 | 0.18(-0.23~0.53)  | -0.10(-0.42~0.25) | -1.78 | 0.08 | 0.58 | 0.24  |
| FPC   | CH22 | 0.73±1.01         | 0.34±0.99         | 1.68  | 0.10 | 0.58 | 0.39  |
| FPC   | CH30 | -0.01±0.47        | -0.02±0.48        | 0.11  | 0.92 | 0.92 | 0.03  |
| FPC   | CH31 | 0.07±0.56         | -0.02±0.66        | 0.57  | 0.57 | 0.85 | 0.13  |
| FPC   | CH32 | 0.03(-0.14~0.26)  | -0.07(-0.24~0.17) | -1.03 | 0.30 | 0.67 | 0.14  |
| FPC   | CH33 | -0.08(-0.30~0.07) | 0.00(-0.22~0.15)  | 1.15  | 0.25 | 0.67 | -0.16 |
| FPC   | CH40 | 0.09(-0.20~0.47)  | -0.13(-0.73~0.35) | -1.53 | 0.13 | 0.59 | 0.21  |
| FPC   | CH41 | 0.43±1.16         | 0.30±0.91         | 0.52  | 0.61 | 0.85 | 0.12  |
| FPC   | CH42 | 0.53±0.95         | 0.40±0.86         | 0.64  | 0.53 | 0.85 | 0.15  |
| FPC   | CH43 | 0.78±0.98         | 0.61±1.18         | 0.66  | 0.51 | 0.85 | 0.15  |
| FPC   | CH44 | 0.27(-0.20~0.97)  | 0.17(-0.42~1.10)  | -0.99 | 0.32 | 0.67 | 0.13  |
| OFC   | CH51 | -0.13(-0.56~0.40) | -0.13(-0.60~0.24) | -0.17 | 0.87 | 0.92 | 0.02  |
| OFC   | CH52 | 0.05±0.59         | -0.16±0.88        | 1.22  | 0.23 | 0.67 | 0.28  |
| OFC   | CH53 | 0.10(-0.19~0.40)  | -0.01(-0.42~0.33) | -0.68 | 0.50 | 0.85 | 0.09  |
| OFC   | CH54 | 0.73±0.88         | 0.76±1.07         | -0.11 | 0.92 | 0.92 | -0.03 |

Note : HbO is more sensitive and dependable than HbR, so only the results of HbR were discussed in this study

**Scheme 8.** Total oxygenated hemoglobin concentration changes in the HC and SD performing 1-back.

| Brain re-<br>gions | Channel | SD group | HC group | t/Z | <i>P</i> -value | FDR | Effect Size |
|--------------------|---------|----------|----------|-----|-----------------|-----|-------------|
|--------------------|---------|----------|----------|-----|-----------------|-----|-------------|

|       |      |                   |                   |       |                  |             |       |
|-------|------|-------------------|-------------------|-------|------------------|-------------|-------|
| DLPFC | CH1  | -0.10(-0.37~0.09) | -0.10(-0.28~0.12) | 0.43  | 0.67             | 0.92        | -0.06 |
| DLPFC | CH2  | -0.10(-0.27~0.12) | -0.01(-0.21~0.42) | 1.35  | 0.18             | 0.64        | -0.18 |
| DLPFC | CH3  | -0.03(-0.36~0.20) | -0.14(-0.40~0.08) | -1.13 | 0.26             | 0.64        | 0.15  |
| DLPFC | CH4  | -0.18±0.42        | -0.02±0.36        | -1.73 | 0.09             | 0.52        | -0.40 |
| DLPFC | CH5  | 0.17±0.67         | -0.10±0.68        | 1.78  | 0.08             | 0.52        | 0.41  |
| DLPFC | CH7  | 0.47±0.92         | 0.46±0.95         | 0.06  | 0.96             | 0.96        | 0.01  |
| DLPFC | CH8  | -0.24(-0.67~0.15) | 0.21(-0.14~0.60)  | 3.79  | <b>&lt; 0.01</b> | <b>0.01</b> | -0.51 |
| DLPFC | CH9  | -0.26±0.49        | -0.06±0.49        | -1.78 | 0.08             | 0.52        | -0.41 |
| DLPFC | CH10 | -0.23±0.54        | -0.07±0.61        | -1.18 | 0.24             | 0.64        | -0.28 |
| DLPFC | CH11 | -0.12(-0.34~0.14) | -0.04(-0.18~0.36) | 1.60  | 0.11             | 0.52        | -0.24 |
| DLPFC | CH12 | -0.10(-0.32~0.15) | -0.05(-0.33~0.16) | 0.37  | 0.71             | 0.92        | -0.05 |
| DLPFC | CH13 | -0.08(-0.35~0.14) | -0.18(-0.39~0.03) | -0.37 | 0.71             | 0.92        | 0.05  |
| DLPFC | CH14 | 0.00(-0.28~0.20)  | -0.14(-0.35~0.09) | -1.18 | 0.24             | 0.64        | 0.16  |
| DLPFC | CH19 | -0.12(-0.51~0.57) | -0.09(-0.24~0.29) | -0.08 | 0.94             | 0.96        | 0.011 |
| DLPFC | CH23 | 0.78±1.26         | 0.49±0.90         | 1.14  | 0.26             | 0.64        | 0.26  |
| DLPFC | CH29 | -0.14±0.56        | -0.01±0.62        | -0.95 | 0.35             | 0.69        | -0.22 |
| DLPFC | CH34 | -0.02(-0.37~0.16) | -0.06(-0.25~0.11) | 0.25  | 0.80             | 0.93        | -0.03 |
| DLPFC | CH50 | -0.27(-0.60~0.43) | -0.13(-0.75~0.23) | 0.06  | 0.95             | 0.96        | -0.01 |
| DLPFC | CH55 | 0.82±1.16         | 0.65±1.42         | 0.58  | 0.57             | 0.91        | 0.13  |
| VLPFC | CH17 | -0.11(-0.48~0.12) | -0.03(-0.22~0.18) | 0.81  | 0.42             | 0.80        | -0.11 |
| VLPFC | CH18 | -0.01(-0.23~0.42) | 0.03(-0.39~0.44)  | -0.28 | 0.78             | 0.93        | 0.04  |
| VLPFC | CH24 | 0.07(-0.39~0.64)  | 0.56(-0.09~0.79)  | 1.77  | 0.08             | 0.52        | -0.24 |
| VLPFC | CH25 | 1.02±1.06         | 0.92±1.29         | 0.37  | 0.71             | 0.92        | 0.09  |
| VLPFC | CH28 | -0.05±0.53        | -0.17±0.44        | 1.03  | 0.31             | 0.68        | 0.24  |

|       |      |                   |                   |       |      |      |       |
|-------|------|-------------------|-------------------|-------|------|------|-------|
| VLPFC | CH35 | 0.06(-0.23~0.38)  | 0.13(-0.30~0.43)  | -0.35 | 0.73 | 0.92 | 0.05  |
| VLPFC | CH39 | 1.12±1.13         | 1.04±1.16         | 0.33  | 0.74 | 0.92 | 0.08  |
| VLPFC | CH45 | 0.76(0.13~1.24)   | 0.41(-0.18~0.93)  | -1.54 | 0.12 | 0.52 | 0.21  |
| FPC   | CH21 | 0.16(-0.24~0.47)  | -0.10(-0.42~0.27) | -1.74 | 0.08 | 0.52 | 0.23  |
| FPC   | CH22 | 0.73±1.01         | 0.35±0.99         | 1.62  | 0.11 | 0.52 | 0.38  |
| FPC   | CH30 | 0.00±0.46         | -0.02±0.49        | 0.12  | 0.91 | 0.96 | 0.03  |
| FPC   | CH31 | 0.07±0.56         | -0.01±0.66        | 0.54  | 0.59 | 0.92 | 0.13  |
| FPC   | CH32 | 0.02(-0.14~0.26)  | -0.05(-0.24~0.16) | -1.02 | 0.31 | 0.68 | 0.14  |
| FPC   | CH33 | -0.08(-0.31~0.07) | 0.01(-0.21~0.15)  | 1.14  | 0.25 | 0.64 | -0.15 |
| FPC   | CH40 | 0.12(-0.19~0.50)  | -0.13(-0.77~0.37) | -1.57 | 0.12 | 0.52 | 0.21  |
| FPC   | CH41 | 0.42±1.16         | 0.32±0.91         | 0.42  | 0.68 | 0.92 | 0.01  |
| FPC   | CH42 | 0.54±0.97         | 0.41±0.86         | 0.61  | 0.54 | 0.91 | 0.14  |
| FPC   | CH43 | 0.78±1.00         | 0.62±1.17         | 0.64  | 0.52 | 0.91 | 0.15  |
| FPC   | CH44 | 0.31(-0.22~0.97)  | 0.18(-0.42~1.14)  | -0.99 | 0.32 | 0.68 | 0.13  |
| OFC   | CH51 | -0.12(-0.54~0.40) | -0.14(-0.60~0.22) | -0.23 | 0.82 | 0.93 | 0.03  |
| OFC   | CH52 | 0.05±0.60         | -0.17±0.90        | 1.24  | 0.22 | 0.64 | 0.29  |
| OFC   | CH53 | 0.09(-0.23~0.41)  | -0.02(-0.42~0.33) | -0.73 | 0.47 | 0.85 | 0.10  |
| OFC   | CH54 | 0.73±0.89         | 0.76±1.07         | -0.15 | 0.88 | 0.96 | -0.04 |

Note : HbO is more sensitive and dependable than HbR, so only the results of HbR were discussed in this study

**Scheme 9.** Total oxygenated hemoglobin concentration changes in the HC and SD performing 2-back.

| Brain regions | Channel | SD group          | HC group          | t/Z  | P-value | FDR  | Effect Size |
|---------------|---------|-------------------|-------------------|------|---------|------|-------------|
| DLPFC         | CH1     | -0.10(-0.38~0.10) | -0.10(-0.26~0.13) | 0.40 | 0.69    | 0.92 | -0.05       |
| DLPFC         | CH2     | -0.08(-0.25~0.14) | -0.03(-0.21~0.42) | 1.30 | 0.19    | 0.69 | -0.18       |



|              |            |                          |                         |             |                 |             |       |
|--------------|------------|--------------------------|-------------------------|-------------|-----------------|-------------|-------|
| DLPFC        | CH3        | -0.03(-0.34~0.21)        | -0.16(-0.41~0.09)       | -1.20       | 0.23            | 0.69        | 0.16  |
| DLPFC        | CH4        | -0.18±0.43               | -0.02±0.36              | -1.69       | 0.10            | 0.67        | -0.39 |
| DLPFC        | CH5        | 0.19±0.69                | -0.09±0.68              | 1.76        | 0.08            | 0.67        | 0.41  |
| DLPFC        | CH7        | 0.46±0.93                | 0.46±0.94               | -0.01       | 0.99            | 0.99        | -0.00 |
| <b>DLPFC</b> | <b>CH8</b> | <b>-0.23(-0.65~0.17)</b> | <b>0.24(-0.13~0.62)</b> | <b>3.74</b> | <b>&lt;0.01</b> | <b>0.01</b> | -0.51 |
| DLPFC        | CH9        | -0.25±0.49               | -0.05±0.49              | -1.76       | 0.08            | 0.67        | -0.41 |
| DLPFC        | CH10       | -0.22±0.54               | -0.06±0.61              | -1.20       | 0.24            | 0.69        | -0.28 |
| DLPFC        | CH11       | -0.12(-0.33~0.15)        | -0.03(-0.18~0.36)       | 1.61        | 0.11            | 0.67        | -0.22 |
| DLPFC        | CH12       | -0.09(-0.32~0.18)        | -0.06(-0.33~0.17)       | 0.31        | 0.76            | 0.92        | -0.04 |
| DLPFC        | CH13       | -0.08(-0.34~0.15)        | -0.19(-0.41~0.03)       | -0.41       | 0.69            | 0.92        | 0.06  |
| DLPFC        | CH14       | 0.00(-0.27~0.21)         | -0.14(-0.35~0.09)       | -1.20       | 0.23            | 0.69        | 0.16  |
| DLPFC        | CH19       | -0.11(-0.51~0.59)        | -0.08(-0.25~0.29)       | -0.11       | 0.91            | 0.96        | 0.02  |
| DLPFC        | CH23       | 0.62(0.07~1.19)          | 0.42(0.04~1.17)         | -0.47       | 0.64            | 0.92        | 0.06  |
| DLPFC        | CH29       | -0.13±0.56               | 0.00±0.63               | -0.94       | 0.35            | 0.74        | -0.22 |
| DLPFC        | CH34       | 0.00(-0.36~0.15)         | -0.04(-0.24~0.11)       | 0.28        | 0.78            | 0.92        | -0.17 |
| DLPFC        | CH50       | -0.25(-0.61~0.46)        | -0.13(-0.76~0.23)       | 0.05        | 0.96            | 0.98        | -0.01 |
| DLPFC        | CH55       | 0.81±1.16                | 0.65±1.41               | 0.53        | 0.60            | 0.92        | 0.12  |
| VLPFC        | CH17       | -0.10(-0.47~0.13)        | -0.03(-0.23~0.20)       | 0.74        | 0.46            | 0.91        | -0.1  |
| VLPFC        | CH18       | 0.01(-0.23~0.46)         | 0.05(-0.40~0.46)        | -0.29       | 0.78            | 0.92        | 0.04  |
| VLPFC        | CH24       | 0.19±1.03                | 0.48±0.68               | -1.47       | 0.15            | 0.68        | -0.34 |
| VLPFC        | CH25       | 0.81(0.44~1.44)          | 0.71(0.23~1.34)         | -0.57       | 0.57            | 0.92        | 0.08  |
| VLPFC        | CH28       | -0.04±0.53               | -0.16±0.45              | 1.06        | 0.29            | 0.69        | 0.25  |
| VLPFC        | CH35       | 0.06(-0.22~0.43)         | 0.12(-0.31~0.45)        | -0.40       | 0.69            | 0.92        | 0.05  |
| VLPFC        | CH39       | 1.10±1.13                | 1.03±1.16               | 0.25        | 0.80            | 0.92        | 0.06  |

|       |      |                   |                   |       |      |      |       |
|-------|------|-------------------|-------------------|-------|------|------|-------|
| VLPFC | CH45 | 0.78±1.10         | 0.50±1.20         | 1.05  | 0.30 | 0.69 | 0.25  |
| FPC   | CH21 | 0.17(-0.21~0.46)  | -0.08(-0.44~0.29) | -1.55 | 0.12 | 0.67 | 0.21  |
| FPC   | CH22 | 0.72±1.01         | 0.36±1.00         | 1.54  | 0.13 | 0.67 | 0.36  |
| FPC   | CH30 | 0.01±0.46         | -0.01±0.49        | 0.14  | 0.89 | 0.96 | 0.03  |
| FPC   | CH31 | 0.07±0.57         | 0.00±0.66         | 0.51  | 0.61 | 0.92 | 0.12  |
| FPC   | CH32 | 0.03(-0.13~0.26)  | -0.02(-0.24~0.15) | -1.07 | 0.29 | 0.69 | 0.14  |
| FPC   | CH33 | -0.07(-0.30~0.08) | 0.01(-0.21~0.16)  | 1.05  | 0.29 | 0.69 | -0.14 |
| FPC   | CH40 | 0.13(-0.19~0.52)  | -0.12(-0.79~0.37) | -1.54 | 0.12 | 0.67 | 0.21  |
| FPC   | CH41 | 0.41±1.15         | 0.32±0.92         | 0.35  | 0.73 | 0.92 | 0.08  |
| FPC   | CH42 | 0.53±0.97         | 0.41±0.87         | 0.58  | 0.56 | 0.92 | 0.14  |
| FPC   | CH43 | 0.77±1.00         | 0.63±1.15         | 0.59  | 0.56 | 0.92 | 0.14  |
| FPC   | CH44 | 0.32(-0.22~0.96)  | 0.16(-0.41~1.18)  | -0.95 | 0.34 | 0.74 | 0.13  |
| OFC   | CH51 | -0.11(-0.53~0.41) | -0.10(-0.61~0.21) | -0.24 | 0.81 | 0.92 | 0.03  |
| OFC   | CH52 | 0.06±0.60         | -0.17±0.91        | 1.27  | 0.21 | 0.69 | 0.30  |
| OFC   | CH53 | 0.07(-0.26~0.45)  | -0.01(-0.42~0.33) | -0.71 | 0.48 | 0.91 | 0.10  |
| OFC   | CH54 | 0.73±0.90         | 0.77±1.07         | -0.20 | 0.84 | 0.93 | -0.05 |

---

Note : HbO is more sensitive and dependable than HbR, so only the results of HbR were discussed in this study
